# Supplementary material for: Transfer of the Dominant Virus Resistance Gene AV-1pro From Asparagus prostratus to Chromosome 2 of Garden Asparagus A. officinalis L.
Source: Frontiers journal article supplement (doi:10.3389/fpls.2021.809069), 2022-02-18
Supplement: Data_Sheet_8.PDF [file Data_Sheet_8.PDF]

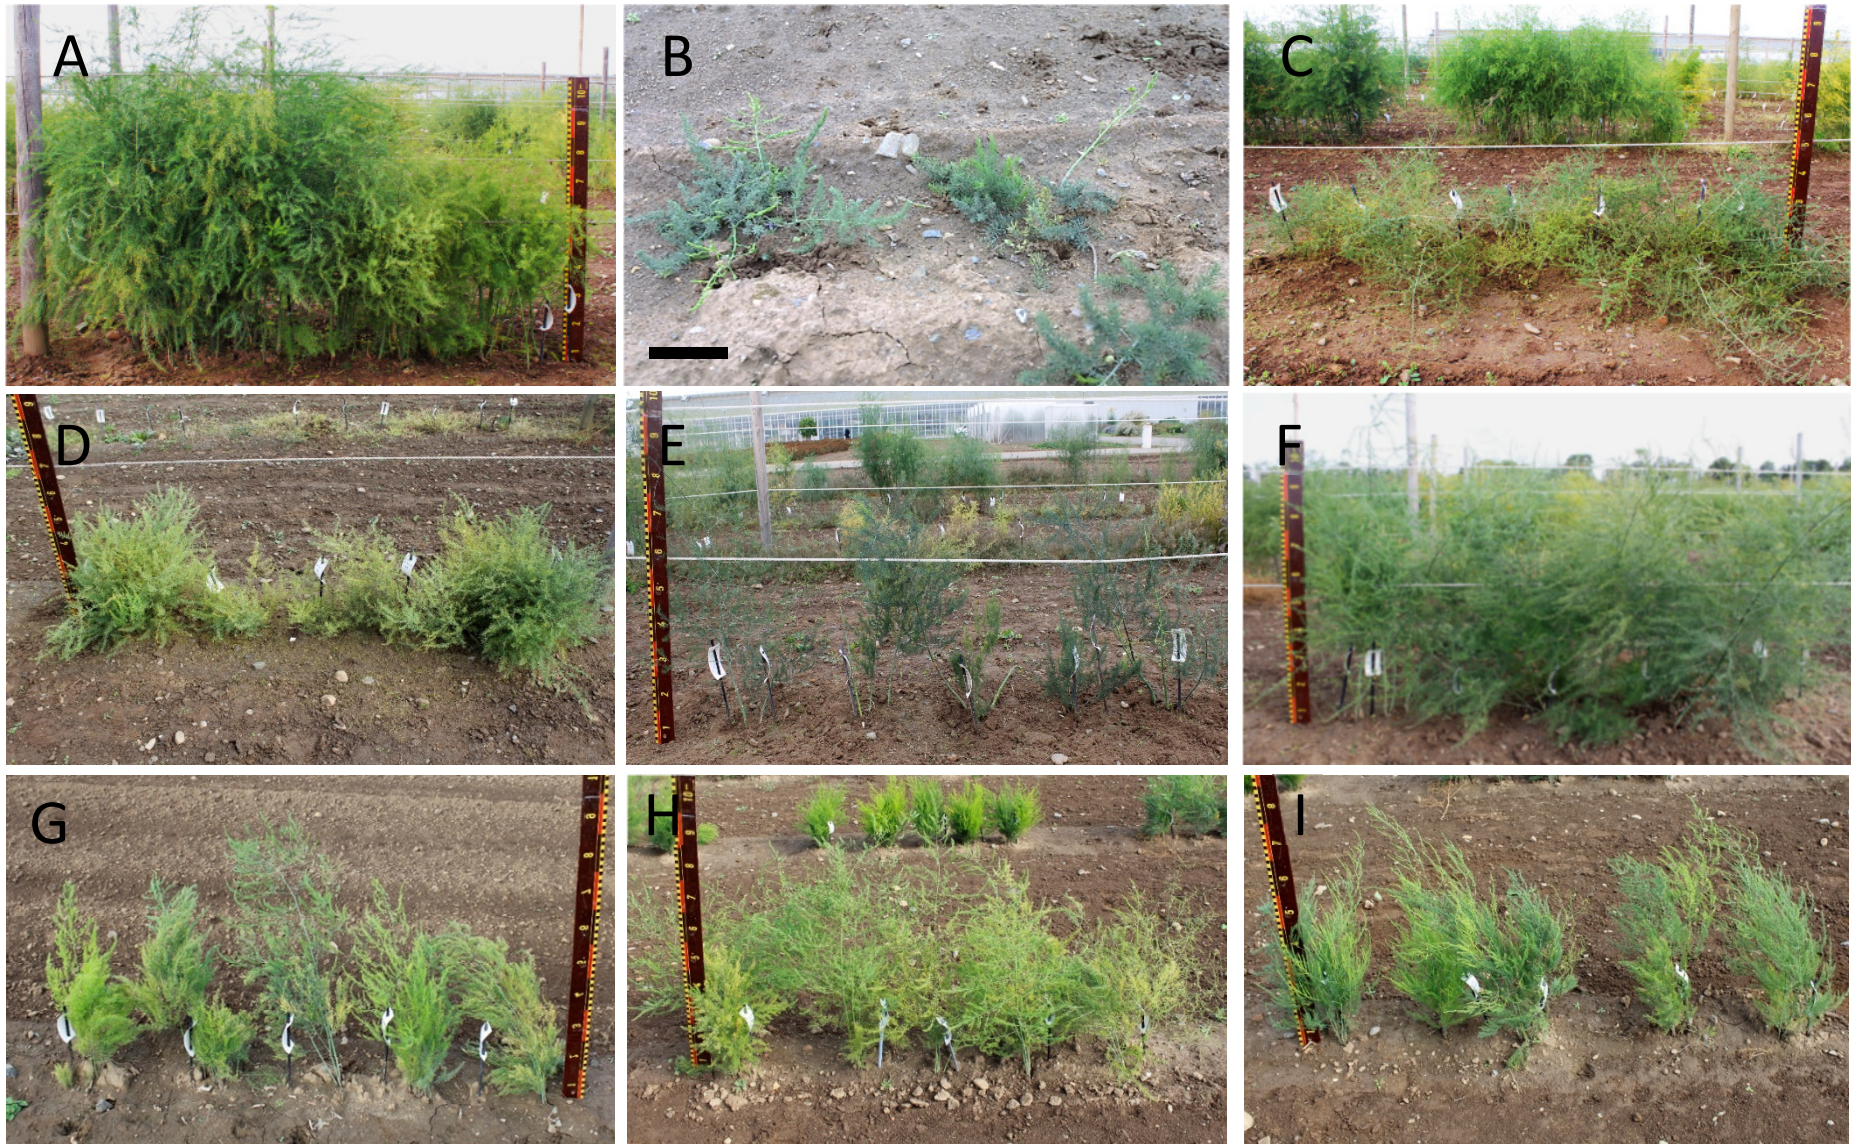

**Figure S2** Microplots of asparagus plants in a research field during end of September. Each five one years old plants were replanted in a 1.5 m microplot row. **A** – *A. officinalis* BL1; **B** - Two single plants of *A. prostratus*, the plants died over the second winter (bar = 10 cm); **C** – AO 258 ( $F_1$ ); **D** - AO 390 ( $BC_1$ ); **E** – AO 538 ( $BC_2$ ); **F** – AO 553 ( $BC_2$ ); **G** – AO 759 ( $BC_3$ ); **H** – AO 779 ( $BC_3$ ); **I** – AO 835 ( $BC_3$ ). Plants **A** and **C-F** are approximately three years old, plants in **G-I** are approximately 1.5 years old and grow 5 month on field. Ruler unit in [cm].
